# Supplementary material for: A general approach for synthesis of a family of functional inorganic nanotubes using highly active carbonaceous nanofibres as templates
Source: Royal Society of Chemistry journal article supplement (doi:10.1039/b811523k), 2008-11-12
Supplement: b811523k.pdf [file b811523k.pdf]

**Supplementary Information:**

**A general approach for synthesis of a family of functional inorganic nanotubes  
using highly active carbonaceous nanofibres as templates \*\***

Jun-Yan Gong, Shi-Rui Guo, Hai-Sheng Qian, Wei-Hong Xu, Shu-Hong Yu\*

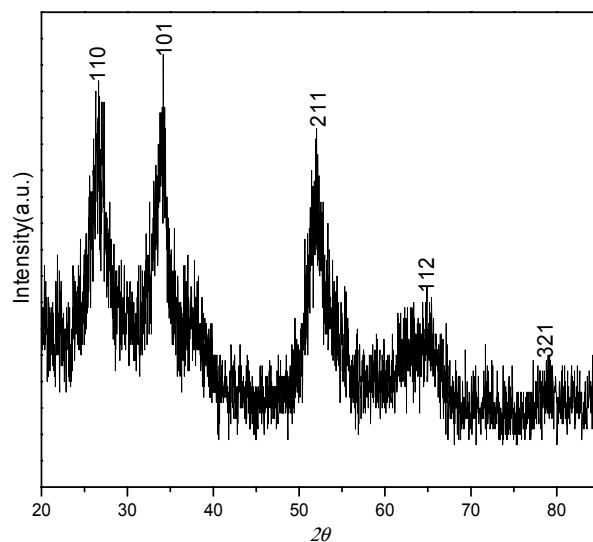

**Fig. S1** XRD pattern of SnO<sub>2</sub> nanotubes prepared from ethanol solution.

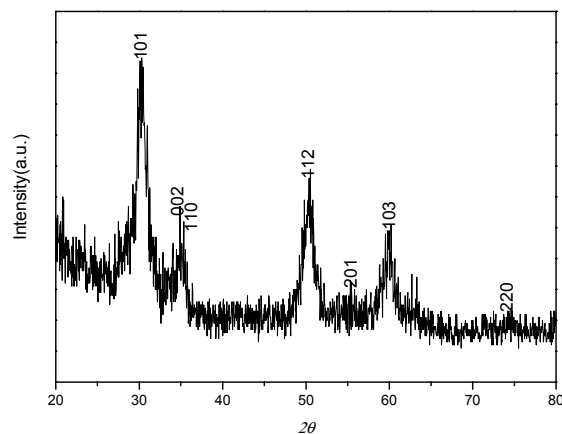

**Fig. S2** XRD pattern of ZrO<sub>2</sub> prepared from ethanol solution.

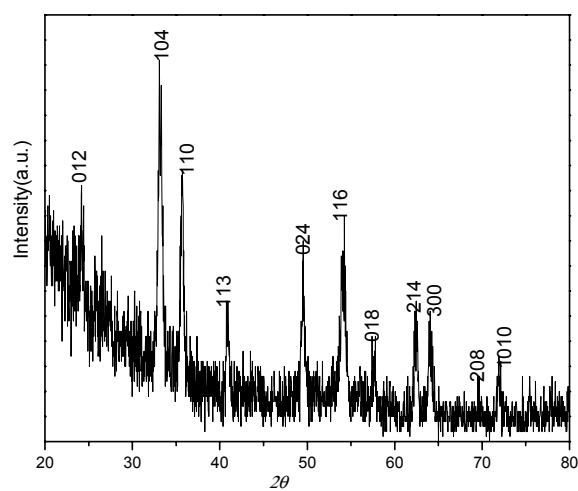

**Fig. S3** XRD pattern of  $\text{Fe}_2\text{O}_3$  nanotubes prepared from ethanol solution.

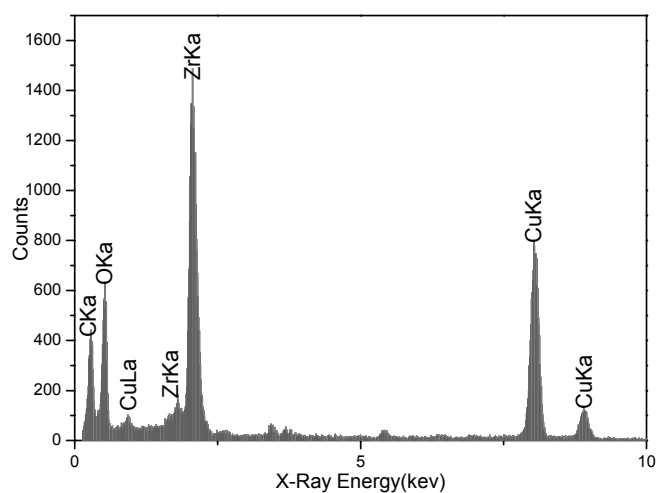

**Fig. S4** The EDS spectra of  $\text{ZrO}_2$  nanotubes. The peaks of Cu originate from the Cu grid.
